# Supplementary material for: Chitosan-coated ultrapure silicon nanoparticles produced by laser ablation: biomedical potential in nano-oncology as a tumor-targeting nanosystem
Source: Royal Society of Chemistry journal article supplement (doi:10.1039/d3na00253e), 2023-01-01
Supplement: d3na00253e1.pdf [file d3na00253e1.pdf]

## Supporting information

### Chitosan coated ultrapure silicon nanoparticles produced by laser ablation: Promising nanocarrier for tumor targeting

Imen Chaabani,<sup>1,2</sup> Abir Salek,<sup>1</sup> Mouna selmi,<sup>1</sup> Leila Njim,<sup>3</sup> Ahmed Al-Kattan,<sup>4</sup> Karim Hosni,  
<sup>1</sup> Tarek Baati.<sup>1§</sup>

<sup>1</sup> Laboratoire des Substances Naturelles, Institut National de Recherche et d'Analyse Physico-chimique, Biotechpôle Sidi Thabet, 2020 Tunisie.

<sup>2</sup> Service de radiologie, Clinique Hospitalo-Universitaire de Médecine Dentaire 5000 Monastir Tunisie

<sup>3</sup> Service d'Anatomie Pathologique, EPS Fattouma Bourguiba de Monastir, Faculté de Médecine de Monastir, Université de Monastir 5000 Tunisie.

<sup>4</sup> Aix-Marseille University, CNRS, LP3 UMR 7341, Campus de Luminy, Case 917, CEDEX 09, 13288 Marseille.

§ Corresponding Author Dr. Tarek BAATI: [tarek.baati@gmail.com](mailto:tarek.baati@gmail.com). Laboratoire des Substances Naturelles, Institut National de Recherche et d'Analyse Physico-chimique, Biotechpôle Sidi Thabet, 2020 Tunisie. Tel : (+216) 71 537 666, Fax : (+216) 71 537 688.

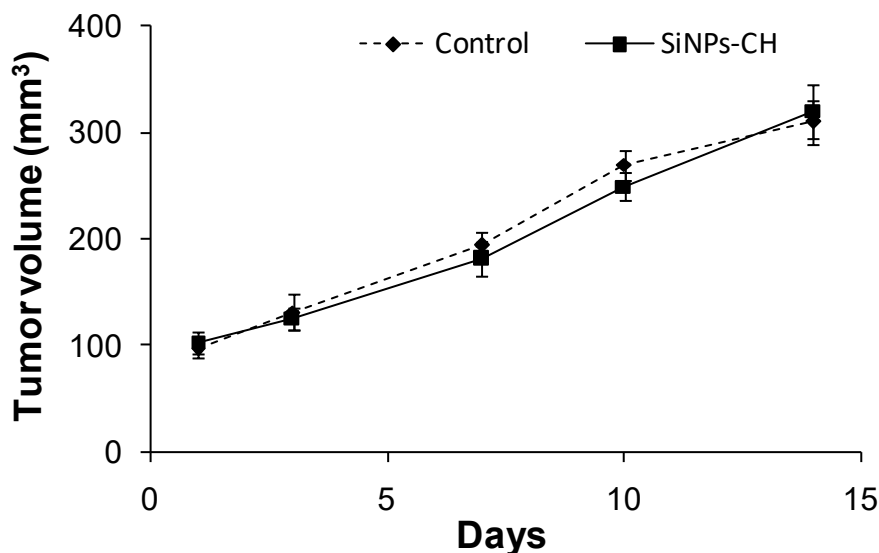

**Figure S1** Tumor growth of control group treated with chitosan or treated mice with 20 mg.Kg<sup>-1</sup> of SiNPs-CH during 1, 7 and 15 days following the intravenous injection showing no significant differences.

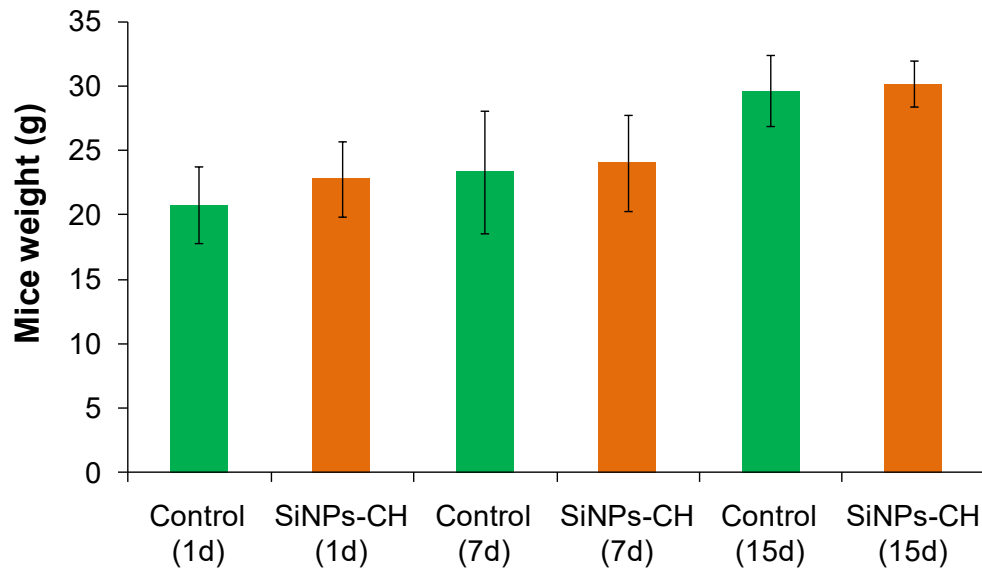

**Figure S2** Body weight of animals treated with chitosan (control) and SiNP-CH (20 mg.Kg<sup>-1</sup>) after 1, 7 and 15 days of the intravenous injection.

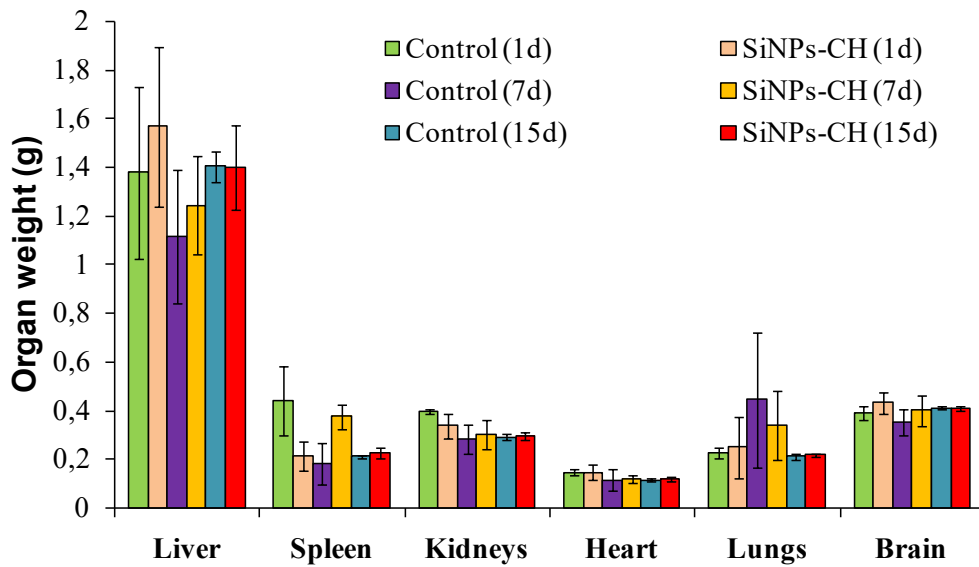

**Figure S3** organs weight of animals treated with chitosan (control) and SiNPs-CH (20 mg.Kg<sup>-1</sup>) after 1, 7 and 15 days of the intravenous injection.

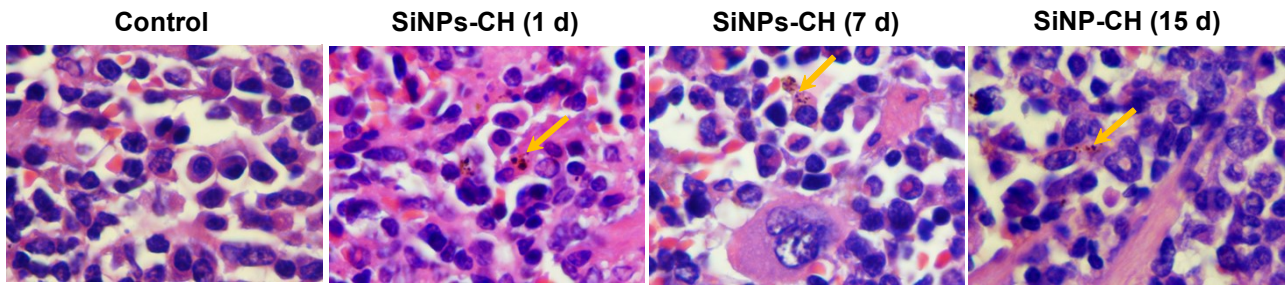

**Figure S4** Histology of mice spleen 1, 7 and 15 days after the intravenous administration of SiNPs-CH (20 mg/kg) compared to the control group. Sections were stained with haematoxylin and eosin. The arrows indicated SiNPs-CH taken up by macrophages.

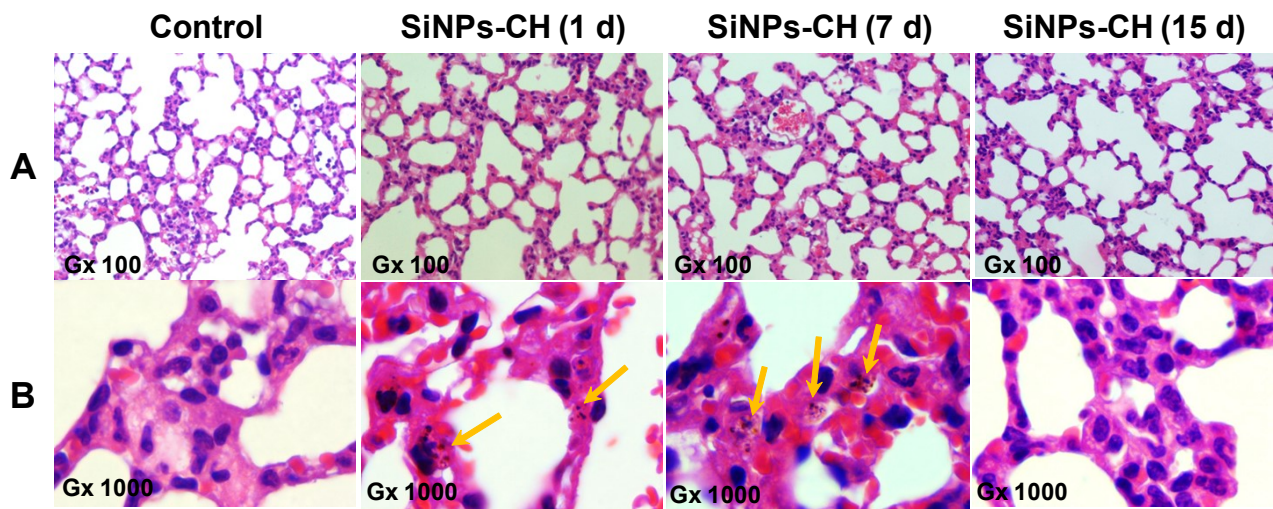

**Figure S5** Histology of mice lungs 1, 7 and 15 days after the intravenous administration of SiNPs-CH (20 mg/kg) compared to the control group. Sections were stained with haematoxylin and eosin. The arrows indicate aggregation of SiNPs-CH in some lungs capillary. (B) is a magnification of (A).

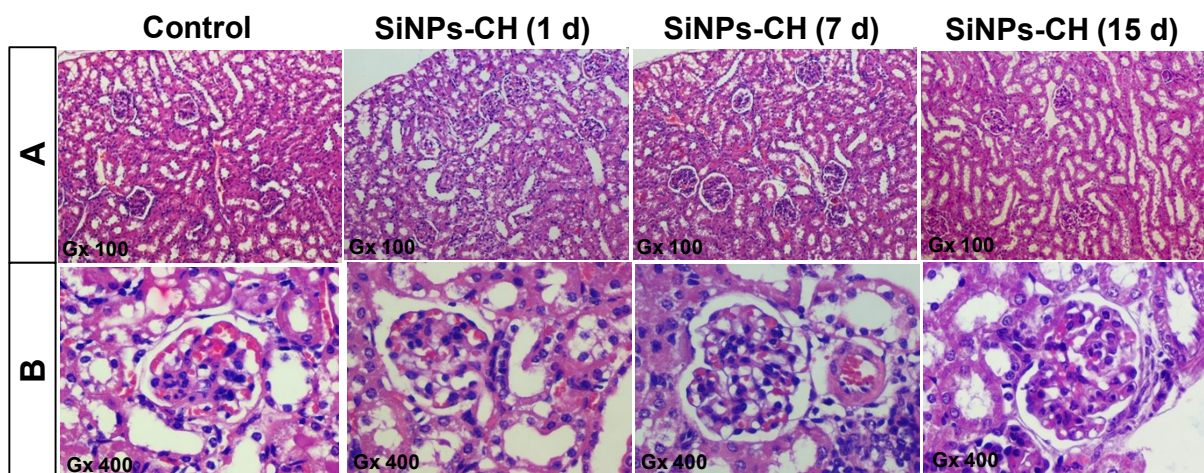

**Figure S6** Histology of mice kidneys 1, 7 and 15 days after the intravenous administration of SiNPs-CH (20 mg/kg) compared to the control group. Sections were stained with haematoxylin and eosin. (B) is a magnification of (A).



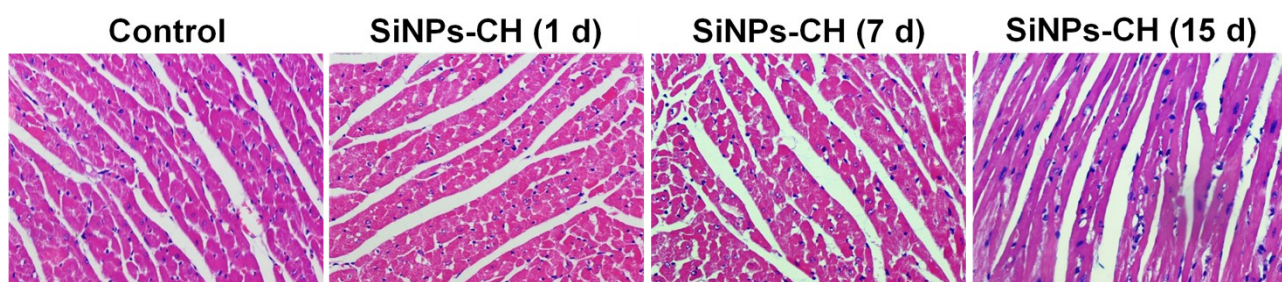

**Figure S7** Histology of mice heart 1, 7 and 15 days after the intravenous administration of SiNPs-CH (20 mg/kg) compared to the control group. Sections were stained with haematoxylin and eosin.

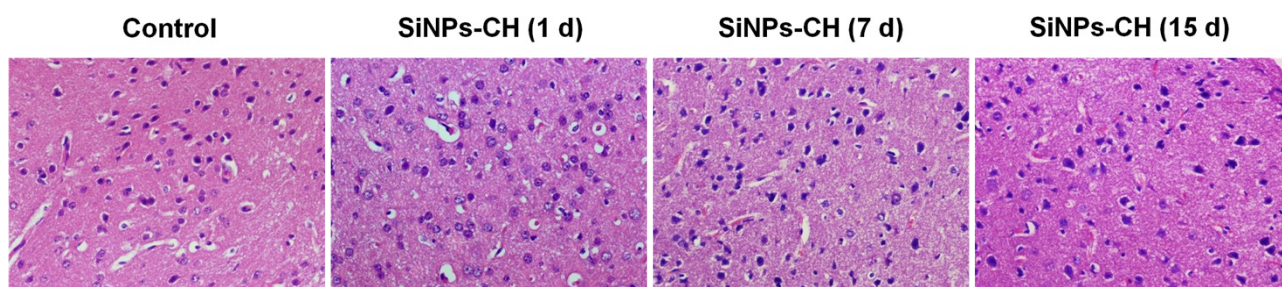

**Figure S8** Histology of mice brain 1, 7 and 15 days after the intravenous administration of SiNPs-CH (20 mg/kg) compared to the control group. Sections were stained with haematoxylin and eosin.

|               | <b>[Si] (<math>\mu\text{g/g}</math> of organ or feces or mL of urine)</b> |                        |                         |                         |
|---------------|---------------------------------------------------------------------------|------------------------|-------------------------|-------------------------|
|               | <b>Control</b>                                                            | <b>1 day</b>           | <b>7 days</b>           | <b>15 days</b>          |
| <b>Liver</b>  | 6,33 ( $\pm$ 3,08)                                                        | 23,79 ( $\pm$ 8,30) ** | 63,24 ( $\pm$ 12,15) ** | 36,53 ( $\pm$ 10,20) ** |
| <b>Spleen</b> | 7,13 ( $\pm$ 1,13)                                                        | 29,34 ( $\pm$ 7,03) ** | 46,18 ( $\pm$ 18,28) ** | 30,24 ( $\pm$ 7,86) **  |
| <b>Kidney</b> | 5,07 ( $\pm$ 1,87)                                                        | 13,67 ( $\pm$ 4,74) *  | 28,33 ( $\pm$ 6,17) **  | 46,48 ( $\pm$ 17,06) ** |
| <b>Lungs</b>  | 4,36 ( $\pm$ 1,35)                                                        | 4,09 ( $\pm$ 2,23)     | 5,01( $\pm$ 2,18)       | 4,29 (1,83)             |
| <b>Heart</b>  | 5,38 ( $\pm$ 1,75)                                                        | 4,46 ( $\pm$ 1,81)     | 3,42 ( $\pm$ 1,26)      | 4,97 ( $\pm$ 2,16)      |
| <b>Brain</b>  | 3,26 ( $\pm$ 1,27)                                                        | 2,20 ( $\pm$ 1,20)     | 10,95 ( $\pm$ 2,64) *   | 14,86 ( $\pm$ 5,03) *   |
| <b>urine</b>  | 0,04 ( $\pm$ 0,012)                                                       | 20,20 ( $\pm$ 9,73) ** | 25,33 ( $\pm$ 8,43) **  | 70,33 ( $\pm$ 20,82) ** |
| <b>Feces</b>  | 1,02 ( $\pm$ 0,13)                                                        | 1,18 ( $\pm$ 0,86)     | 1,36 ( $\pm$ 0,96)      | 2,04 ( $\pm$ 1.03)      |

**Table S1** Silicon content in different organs, urine and feces of mice intravenously administered with a solution of Si-NPs-CH (20 mg/kg) 1, 7 and 15 days after the injection related to control group of mice (n = 6, data are the mean  $\pm$  SD). Statistical significance was determined by Tukey HSD test. \*p < 0.05, \*\*p < 0.01 compared to the control.
